# 1 **Construction of two-input logic gates using Transcriptional Interference**

2 Antoni E. Bordoy<sup>1,#</sup>, Nolan J. O'Connor<sup>1,#</sup>, and Anushree Chatterjee<sup>1,2</sup>

3 <sup>1</sup>Department of Chemical and Biological Engineering, University of Colorado Boulder, Colorado  
4 80303, USA. <sup>2</sup>BioFrontiers institute, University of Colorado Boulder, Colorado 80303, USA.

5 <sup>#</sup>These authors contributed equally

6 <sup>\*</sup>To whom correspondence should be addressed. Email: [chatterjee@colorado.edu](mailto:chatterjee@colorado.edu)

7

## 8 **ABSTRACT**

9 Transcriptional Interference (TI) has been shown to regulate gene expression at the DNA level via  
10 different molecular mechanisms. The obstacles present on the DNA that a transcribing RNA  
11 Polymerase might encounter, e.g. a DNA-bound protein or another RNA Polymerase, can result  
12 in TI causing termination of transcription, thus reducing gene expression. However, the potential  
13 of TI as a new strategy to engineer complex gene expression modules has not been fully explored  
14 yet. Here we created a series of two-input devices using the presence of a roadblocking protein  
15 using both experimental and mathematical modeling approaches. We explore how multiple  
16 characteristics affect the response of genetic devices engineered to act like either AND, OR, or  
17 Single Input logic gates. We show that the dissociation constant of the roadblocking protein,  
18 inducer activation of promoter and operator sites, and distance between tandem promoters tune  
19 gate behavior. This work highlights the potential of rationally creating different types of genetic  
20 responses using the same transcription factors in subtly different genetic architectures.

21 **Key words: Transcriptional interference, Transcription factor roadblock, logic gates, genetic**  
22 **devices**

23

## 24 INTRODUCTION

25 Engineering bacteria to perform industrially and clinically useful tasks requires the implementation  
26 of sophisticated artificial gene regulation programs <sup>1</sup>. The size and complexity of these programs  
27 has been shown to induce several design challenges, including varying construct performance in  
28 different hosts <sup>2-4</sup>, the propagation of noise through cascading repressors <sup>5</sup>, and cross-talk between  
29 genetic parts <sup>6,7</sup>. Thus, in order to be able to engineer gene expression in an efficient and  
30 sophisticated manner, new genetic devices with minimal size, i.e a low DNA footprint, are  
31 required. One strategy towards this goal is reducing the DNA length needed to encode a certain  
32 response, i.e. minimizing the DNA footprint of a genetic device. Here we study how similar  
33 transcription factor recognition sequences with a similar DNA footprint can lead to diverse logic  
34 gate behaviors.

35 Transcription factors bind to specific DNA recognition sequences to regulate RNA polymerase  
36 (RNAP) activity by either recruiting it to promoter sites (activators) or blocking its binding to the  
37 DNA (repressors). Additionally, traffic of RNAPs can be controlled during transcription by the  
38 presence of “obstacles”, i.e. DNA-binding proteins and other RNAPs, usually causing the  
39 transcriptional process to prematurely end, decreasing gene expression. This second layer of  
40 regulation is a mode of Transcriptional Interference (TI) <sup>8</sup> and is present at different extents in a  
41 variety of organisms comprising the three domains of life <sup>9-13</sup>. The presence of TI in a multitude  
42 of organisms and its potential to create higher-order gene regulation <sup>14,15</sup> has brought interest in its  
43 modeling <sup>15,16</sup> and engineered use as a tool to control gene expression <sup>17-20</sup>.

44 Here we propose that TI can be used to obtain more complex gene regulation functions compared  
45 to gene expression driven by a single promoter. If the DNA to be transcribed is free of obstacles,  
46 transcription can proceed freely. However, if an obstacle to transcription is deliberately placed  
47 downstream of a promoter region, the RNAP traffic can be regulated by the controlled presence  
48 and absence of such an obstacle. In this transcriptional context, we refer as obstacle to: (i) a DNA  
49 binding protein in the same (sense) DNA strand from which transcription is taking place, and (ii)  
50 an RNAP initiating at or originated from a downstream sense promoter (Fig. 1a). For constitutive  
51 promoters, only the latter case occurs; however, inducible promoters can be understood as a  
52 conditionally activated combination of both obstacles. Since these obstacles can lead to TI,  
53 hereafter we refer to them as Transcriptional Interference Modules (TIMs).

54 Depending on which TIM the transcribing RNAP elongating complexes (ECs) encounter, different  
55 TI mechanisms may occur: (i) roadblock, in which the presence of a DNA bound protein either in  
56 the sense or antisense strand can impede the progression of ECs (Fig. 1a) <sup>21,22</sup>; (ii) sitting duck  
57 interference, which is the unbinding of a promoter-bound RNAP, can also be caused by the  
58 movement of a tandem (Fig. 1a) or convergent EC <sup>23</sup>; (iii) occlusion, which can be caused by an  
59 upstream tandem promoter or a downstream convergent promoter, is the process by which an  
60 RNAP is prevented to bind to a promoter due to the presence of an EC in that promoter region <sup>24-</sup>  
61 <sup>27</sup>; and (iv) collision <sup>14,15,18,19,28,29</sup>, occurring between two ECs moving in opposite directions, in  
62 which case either one or both ECs are susceptible to fall off the DNA <sup>30</sup>. This study will focus on  
63 engineering the TI mechanisms of roadblock and sitting duck interference.

64 The combination of an inducible promoter with different downstream TIMs can lead to diverse  
65 gene expression patterns. Therefore, genetic devices with multiple inputs can be created to control  
66 the production of a protein, which is considered the output of the device (Fig. 1b). Here we focus  
67 on two-input logic gates. We show that a genetic device that has an architecture of an inducible  
68 promoter followed by a downstream roadblock site can perform AND logic, while a device with a  
69 similar architecture in which transcriptional activity is provided to the downstream TIM (thus  
70 transforming it into an inducible promoter) can exhibit OR logic. In this work, we present a series  
71 of two-input genetic devices designed with the aim of understanding and exploiting more complex  
72 ways of controlling RNAP traffic. We explore how the positioning and recognition sequence of  
73 the TIMs affect both gene expression and logic gate performance and develop mathematical  
74 models representing these constructs to validate and predict construct behavior. We demonstrate  
75 how the behavior of the genetic devices can be modified in a predictable manner by tuning  
76 biological parameters such as the dissociation constant of the roadblocking protein, activation of  
77 promoter and operator parts by their chemical inducers, and the distance between the two modules.  
78 Taken together, our results demonstrate the diverse gene expression profiles that are possible  
79 through rationally engineering simple genetic architectures.

## 80 **RESULTS**

### 81 **Creation of AND logic using a downstream LacI roadblock site**

82 We first anticipated that a TIM composed of a roadblocking protein downstream of an inducible  
83 promoter would behave as a two-input AND gate. Thus, we designed construct pAE\_LG01

84 (Supplementary Table S1) consisting of a pTet promoter followed by the native LacI binding site  
85 (LacO) located 47 bp downstream. LacO is composed of two  $O_1$  sites separated by a 6 bp spacer  
86 sequence (Fig. 1b, Supplementary Table S1)<sup>31</sup>. Transcriptional activity of pTet is controlled by  
87 the presence of aTc, which prevents the binding of repressor TetR to the DNA. The extent of  
88 successful transcription can then be further controlled by the magnitude of roadblock at the  
89 downstream TIM caused by the presence of the LacI repressor, which has been observed to greatly  
90 reduce transcription both *in vitro* and *in vivo*<sup>21,32</sup>. Therefore, the transcriptional activity can also  
91 be controlled by the level of IPTG in the system, which binds to LacI and impedes its binding to  
92 the DNA. This construct is expected to minimally activate gene expression when only aTc is added  
93 while not responding to IPTG addition unless it is in combination with aTc (Supplementary  
94 Figures S11-S18), in which case the construct is expected to behave as an AND gate and produce  
95 high levels of GFP expression as its output only when both aTc and IPTG are present.

96 To express GFP, RNAPs need to be able to bind to pTet and freely transcribe through the  
97 roadblocking LacO site, i.e. without being roadblocked by LacI (Fig. 1c, bottom). Whereas if only  
98 aTc is available, transcription will be reduced by the presence of LacI (Fig. 1c, middle top). As  
99 expected, pAE\_LG01 had a 10-fold increase in GFP expression only when both aTc and IPTG  
100 were added to the cells (Fig. 1c, bottom). However, in presence of aTc only, expression increased  
101 just 1.9-fold (Fig. 1c, middle top). Therefore, bound LacI caused a 5.2-fold decrease in GFP  
102 expression due to roadblock. This demonstrates that AND logic can be created by placing a  
103 roadblock site downstream of an inducible promoter.

#### 104 **Point mutations in the LacO site tune the extent of roadblock repression caused by LacI,** 105 **changing logic behavior**

106 We hypothesized that in order to achieve good AND behavior, the roadblock interference needs to  
107 be strong, i.e. most RNAPs must not be able to read through it (Fig. 2a, top). Conversely, if the  
108 roadblock strength is low, RNAPs will read through it (Fig. 2a, bottom). To test this hypothesis,  
109 we created a library of constructs with one mutation in each of the  $O_1$  sites of LacO that modifies  
110 the dissociation constant,  $K_D$ , of LacI (Fig. 2a, Supplementary Table S1)<sup>33</sup>. LacI  $K_D$  values ranged  
111 from 0.0092 to 2.34  $\mu$ M. We measured the GFP expression of these constructs at the following  
112 four possible inducer combinations—no inducers, aTc only (50 ng/mL), IPTG only (1 mM), and  
113 aTc+IPTG. Expression was always the highest when both aTc and IPTG were present and lowest

114 at the basal and IPTG only conditions (Fig. 2b). We observed increases in GFP expression ranging  
115 from 3.2- to 45-fold at the aTc+IPTG condition compared to the basal condition across the  
116 constructs. As anticipated, when cells were induced only with aTc, intermediate levels of gene  
117 expression ranging from 1.9- to 19-fold, with respect to basal, were observed (Fig. 2b).

118 We then characterized the logic behavior of these constructs using a model previously developed  
119 by Cox *et al.*<sup>34</sup>. The model quantifies the dynamic range in expression,  $r$ ; the asymmetry,  $a$ , i.e.  
120 the relative responsiveness of the device to each input; and the logic type,  $l$ , i.e. whether one, two  
121 or three input combinations result in the output being ON. For the constructs presented here, we  
122 observed behaviors ranging from asymmetric AND gate to Single Input aTc Gate (Fig. 2b, c). We  
123 have also represented these results in Fig. 2b by color-coding the GFP expression profile of each  
124 construct with the calculated Euclidian distance from the logic ( $l$ ) and asymmetry ( $a$ ) values  
125 obtained for each construct to the perfect AND gate ( $l=1, a=0$ ). This distance,  $d_{10}$ , is dependent on  
126  $l$  and  $a$ , and is a measure of the deviation from pure AND behavior (Equation 1, Materials and  
127 Methods), with higher values indicating a greater deviation from AND gate behavior. Graphically,  
128 this parameter  $d_{10}$  represents the distance of a particular gate from the bottom right vertex of a  
129 triangle plot, which corresponds to pure AND behavior ( $l=1, a=0$ ) (Fig. 2c). In general, better  
130 AND behavior is obtained when LacI  $K_D$  is small, whereas the behavior tends to resemble an aTc  
131 gate ( $l=0.5, a=1$ ) as LacI  $K_D$  becomes larger (Fig. 2b, c). This can also be observed by looking at  
132 the difference between the GFP expression levels at the aTc only condition and at the aTc+IPTG  
133 condition (Fig. 2b). This difference becomes virtually negligible for our control construct,  
134 pAE\_LG04 (Supplementary Table S1), in which two mutations in each  $O_1$  sequence completely  
135 removed LacI binding. Therefore, pAE\_LG04 behaves as a pure aTc gate.

136 The logic behavior of each construct is mainly determined by the intermediate levels of GFP  
137 expression when only aTc is present relative to the high GFP expression obtained when both aTc  
138 and IPTG are present. In other words, as we had hypothesized, the magnitude of the roadblock is  
139 the main factor dictating how well each AND construct behaves. If the roadblock caused by LacI  
140 is weak, then the ECs originating from pTet are able to dislodge LacI and continue transcription  
141 downstream, ultimately producing higher levels of GFP. To quantify the extent of successful  
142 transcription through the downstream roadblocking LacI site, we used Equation 3:

143 
$$\text{Fractional Readthrough} = \frac{\text{GFP}_{\text{aTc}} - \text{GFP}_{\text{Basal}}}{\text{GFP}_{\text{a+I}} - \text{GFP}_{\text{IPTG}}} \quad (1)$$

144 When plotted against LacI  $K_D$ , we observed that the fractional readthrough follows an excellent  
145 logarithmic trend (Adj.  $R^2=0.99$ ) for  $K_D$  values greater than  $\sim 0.03$  pM (Fig. 2d). This data agrees  
146 with our suggested model for roadblock (Fig. 2a). For  $K_D$  values smaller than  $\sim 0.03$  pM, a plateau  
147 exists in which further decrease in  $K_D$  does not diminish readthrough any further. In this scenario,  
148 the unbinding frequency of LacI from the DNA is so small that the possibility for either an EC to  
149 escape roadblock due to momentarily LacI unbinding or for an EC to dislodge LacI is at its  
150 minimum. Therefore, most encounters between an EC and LacI result in the unbinding of the EC  
151 from the DNA (Fig. 2a, top, 2d). However, when LacI  $K_D$  values are high, the more frequent  
152 unbinding of LacI from the DNA increases the chances of a certain EC to escape the roadblock  
153 event before LacI rebinds to the DNA, while dislodging of LacI upon a clash with an incoming  
154 EC is also possible (Fig. 2a, bottom). Accordingly, six constructs that had lower  $K_D$  (pAE\_LG01,  
155 02, 03, 05, 06, 13) values had a significantly decreased GFP expression in presence of aTc and  
156 absence of IPTG compared to 1 mM IPTG (Mann-Whitney  $U$  test,  $p$ -value $<0.05$ ). The decrease in  
157 GFP expression caused by the presence of LacI ranged from 1.8- to 5.4-fold between constructs  
158 (Fig. 2b), with the closest AND gate behavior exhibited by the constructions with the lowest LacI  
159  $K_D$ . This is consistent with the fractional read through observed as  $K_D$  is increased (Fig. 2d). The  
160 change in  $K_D$  also impacted the regulatory range ( $r$ ) between constructs, which tended to be higher  
161 at intermediate  $K_D$  values. These results show how roadblock can be engineered to downregulate  
162 gene expression in a predictable manner.

### 163 **AND behavior is improved through tuning inducer concentrations**

164 Though dynamic range is typically maximized at saturating inducer concentrations, optimal AND  
165 behavior, quantified with  $d_{10}$ , does not always occur at these conditions. We calculated  $d_{10}$  and the  
166 parameters that comprise it—asymmetry,  $a$ , and logic,  $l$ —at each set of inducer concentrations for  
167 our library of AND constructs (Materials and Methods, Supplementary Figures S3-S10). Low  $K_D$   
168 (pAE\_LG02) and high  $K_D$  (pAE\_LG04) constructs experienced different inducer-dependent  
169 expression trends. We observed that, in the case of pAE\_LG02,  $d_{10}$  generally decreased with high  
170 IPTG and low aTc concentrations (Fig. 3a-b). Higher pTet activation apparently permits  
171 readthrough of the LacI roadblock in the absence of IPTG, and therefore high aTc concentrations

172 reduce AND-like behavior (increase  $d_{10}$ ). In the case of pAE\_LG04, the LacI  $K_D$  is so high that  
173 there is no clear trend in  $d_{10}$  or other logic parameters with changing inducer concentration (Fig.  
174 3a-b).

175 The LacI  $K_D$  value of a construct, along with the aTc and IPTG concentrations, influence AND  
176 behavior (Supplementary Figures S3-S10). When all combinations of inducers for each construct  
177 are plotted, it is evident that low  $K_D$  constructs exhibit more AND-like behaviors at all  
178 concentrations of aTc and IPTG (Fig. 3c, Supplementary Figures S3-S10). When GFP expression  
179 of all the constructs at the concentrations of aTc and IPTG that minimize  $d_{10}$  are plotted, more  
180 AND-like behavior is apparent among the constructs with LacI  $K_D$  values below 0.21 pM (Fig.  
181 3d). The GFP expression patterns at these  $d_{10}$ -minimizing conditions offer low asymmetry—the  
182 construct responds to both inducers equally—and high logic—there is a clear ON state and three  
183 OFF states, corresponding to AND behavior (Fig. 3d). In the case of pAE\_LG03, for example, this  
184 adjustment of inducer concentrations resulted in a >3-fold decrease in  $d_{10}$ , trending toward ideal  
185 AND behavior.

186 Though each of these  $d_{10}$ -minimizing conditions reduces the construct's dynamic range compared  
187 with its expression profile at maximum aTc and IPTG concentrations (Fig. 2b, 3d), the  
188 improvement in AND behavior may in some conditions be more useful. For example, in  
189 applications where expression of the protein of interest needs to be tightly restricted in OFF  
190 conditions, true AND behavior may improve circuit performance. More broadly, this analysis  
191 shows that the activation of a tandem promoter and operator site are highly dependent on their  
192 relative strengths, and that small changes in the strength of each part significantly changes their  
193 performance in tandem.

## 194 **Mathematical modeling of RNAP roadblock and development of transfer functions**

195 To gain mechanistic insights into the logic gate performance of our constructs, we developed  
196 mathematical models that predict GFP expression as a function of inducer concentrations (Fig 4a).  
197 We first used the Hill equation<sup>35</sup> to derive an inducer-dependent expression for the fraction of free  
198 transcription factor capable of binding to the promoter or operator sites. For example, the fraction  
199 of TetR with aTc bound is a function of the equilibrium dissociation constant for aTc to TetR,  $K_d$ ,  
200  $a_{Tc:TetR}$ , the concentration of aTc,  $[aTc]$ , and the Hill coefficient,  $m$ , which was either fitted or set

201 to a value of 2, corresponding to the 2 molecules of aTc shown to substantially repress TetR:DNA  
202 binding<sup>36</sup>.

$$203 \quad f_{\text{aTc:T}} = \frac{[\text{aTc}]^m}{K_{\text{d,aTc:TetR}} + [\text{aTc}]^m} \quad (2)$$

204 Thus, the fraction of free TetR capable of binding to TetO was estimated as:

$$205 \quad f_{\text{T}} = 1 - f_{\text{aTc:T}} \quad (3)$$

206 We then used the Shea-Ackers formalism<sup>37</sup> to derive transfer functions describing the occupancy  
207 of promoter and operator sites ( $TF_{\text{pTet}}$ ,  $TF_{\text{LacO}}$ ), with binding events that permit transcription in the  
208 numerator and all possible states in the denominator (Fig. 4a). For example,  $TF_{\text{pTet}}$  includes RNAP  
209 binding to the promoter ( $K_{\text{a,RNAP}} \times [\text{RNAP}]$ ) to initiate transcription in the numerator, and all other  
210 possible states—including TetR binding to one or both TetO sites on the pTet promoter—in the  
211 denominator:

$$212 \quad TF_{\text{pTet}} = \frac{K_{\text{a,RNAP}} \times [\text{RNAP}]}{1 + (K_{\text{a,TetR}} \times [\text{TetR}] \times f_{\text{T}})^2 + 2 \times (K_{\text{a,TetR}} \times [\text{TetR}] \times f_{\text{T}}) + K_{\text{a,RNAP}} \times [\text{RNAP}]} \quad (4)$$

213 The resulting transfer functions were combined to develop model equations (see Supplementary  
214 section AND Gate Model Equation Derivations) that were fit to GFP expression data for varying  
215 aTc and IPTG concentrations for each of the constructs described (Fig. 4a). The constants and  
216 fitted biophysical parameters are reported in Supplementary Table 22 and Supplementary Figures  
217 S11-S18, respectively, and were compared against literature values whenever possible (see  
218 Supplementary section Mathematical Model Derivations).

219 After comparing several model equations, we found that model fits were improved through the  
220 addition of terms to our model equations that describe the effects of TI—namely the relationship  
221 between the LacO association strength and transcriptional roadblock. We quantitatively compared  
222 models using the Akaike Information Criterion (AIC)<sup>38</sup>, a model selection criterion that compares  
223 the goodness of each model's fit with respect to the number of terms in the model equation, with  
224 lower AIC values indicating a better model (Fig. 4a, Supplementary Table S24). Our three best  
225 performing models are shown in Fig. 4a. We found that our AND gate behavior was best captured  
226 using a model equation that consists of both an AND term ( $TF_{\text{pTet}} \cdot TF_{\text{pLac}}$ ) and a single-input gate



227 term ( $TF_{pTet}$ ), as this function better describes the observed transcriptional readthrough than a pure  
228 AND function (Fig. 4a). The model was able to predict the fold change in GFP for the entire range  
229 of aTc and IPTG concentration variations as shown by the heat maps for construct pAE\_LG02  
230 with  $R^2$  value of 0.99 (Fig. 4b). The model also fit our other AND constructs well, with  $R^2$  values  
231 ranging from 0.97-1 (Figures S11-S18). The predictive ability of this simple mathematical model  
232 demonstrates how small sequence modifications can reliably and significantly change AND gate  
233 behavior.

### 234 **Addition of transcriptional activity associated with a weak roadblock to the downstream** 235 **TIM creates OR logic**

236 Transcriptional factor regulation can also result in other Boolean behaviors. For example, adding  
237 transcriptional activity to the LacO site, converting it to pLac promoter, will result in tandem  
238 transcription from both the upstream pTet and the downstream pLac. Tandem transcription has  
239 been previously used to create OR logic<sup>39,40</sup>; however, the design specifications enable and  
240 optimize such behavior have not yet been investigated in depth. The output of an OR gate is ON  
241 when either one or both its inputs are ON, thus being only OFF when both inputs are OFF. Here  
242 we show that OR logic is only achieved when the roadblock created by the downstream inducible  
243 promoter is reduced. In other words, we show that any hypothetical pair of tandem promoters can  
244 potentially result in OR logic by engineering the extent of roadblock by tuning the downstream TF  
245 dissociation constant.

246 First, we created construct pAE\_LG15, which is characterized by a pTet-pLac separation of 47 bp  
247 and a LacI  $K_D=0.036$  pM (Fig. 5a). This construct's behavior demonstrated that providing the  
248 downstream TIM with transcriptional activity is not sufficient to create OR behavior (Fig. 5b,  
249 pAE\_LG15). We use the Euclidean distance parameter  $d_{00}$  as a metric for OR behavior, since pure  
250 OR behavior is defined by  $l=0$ ,  $a=0$ . Our results show that tandem transcription in this construct  
251 did not result in OR logic. Rather, the observed behavior for pAE\_LG15, with an associated  
252  $d_{00}=0.76$ , was a single input gate (SIG) responsive to IPTG, the inducer of the downstream  
253 promoter, pLac (Fig. 5a and b, left). For this construct, the dissociation constant of LacI is small;  
254 therefore, LacI has a dual role of repressing transcriptional activity of pLac by blocking binding  
255 of RNAP to it while also roadblocking the upstream ECs originating from pTet; the addition of  
256 IPTG causes the alleviation of both forms of repression (Fig. 5a, left). We then hypothesized that

257 in order to achieve a more OR-like behavior, the readthrough at the downstream TIM had to be  
258 increased (Fig. 5a, right), i.e. the roadblock magnitude needed to be decreased. For the particular  
259 system presented here, this means a higher GFP expression upon the addition of aTc only.

260 We took two different approaches to optimize OR behavior: (i) we increased the separation  
261 between pTet and pLac from 47 bp to 72 bp (Fig. 5a, middle), and (ii) we increased LacI  $K_D$  by  
262 introducing mutations in LacO. Specifically, we increased the separation between pTet and pLac  
263 from 47 bp to 72 bp in order to allow two stalled ECs, assuming an EC footprint of 35 bp, to sit in  
264 front of the roadblocking protein at the longest distance <sup>41</sup>. This is based on previous reports that  
265 suggest that longer separations between the transcribing promoter and the roadblocking site can  
266 reduce the extent of roadblock due to RNAP cooperativity <sup>22</sup>. The latter approach was taken to  
267 explore whether the results previously obtained for AND constructs would also hold true with this  
268 new architecture.

269 While keeping LacI  $K_D$  constant at 0.036 pM, we increased the separation between pTet and pLac,  
270 from 47 bp (pAE\_LG15) to 72 bp (pAE\_LG21). Only a slight improvement in OR behavior was  
271 observed ( $d_{00}$  decreased from 0.76 to 0.64, Supplementary Table S7) due to a significant 1.4-fold  
272 increase in GFP expression when only aTc was added to the cells (Fig. 5b, pAE\_LG15 and  
273 pAE\_LG21). The increased spacing likely allowed for an extra stalled EC in front of LacI—that  
274 could potentially induce RNAP cooperativity <sup>42</sup>—only to increase readthrough 1.4-fold  
275 (Supplementary Figure S2). However, no significant differences were observed for the basal and  
276 aTc+IPTG conditions, suggesting the cause of the change in gene expression is a reduced LacI  
277 roadblock interference.

278 We next increased LacI  $K_D$  either ~2- or ~6-fold by mutating the LacO region within pLac for all  
279 the constructs (Fig. 2a). In the case of the 2-fold  $K_D$  increase, the GFP expression at the aTc only  
280 condition increased  $9.6 \pm 3.5$ -fold and  $10.0 \pm 3.3$ -fold with respect to the basal condition for 47 bp  
281 (Fig. 5b, pAE\_LG23) and 72 bp (Fig. 5b, pAE\_LG25) separation, respectively, and remained  
282 constant for the basal, IPTG, aTc+IPTG conditions. This improvement in OR behavior is reflected  
283 in lower  $d_{00}$  values for pAE\_LG23 and pAE\_LG25 (Supplementary Table S7) and suggests that  
284 increasing the  $K_D$  of the downstream roadblock to allow readthrough from the upstream promoter  
285 is necessary for more OR-like behavior. Interestingly, this increase in LacI  $K_D$  removed any effect  
286 of increasing interpromoter spacing—the  $d_{00}$  values of pAE\_LG23 and pAE\_LG25 are nearly

287 identical (Fig. 5b; Supplementary Table S7), reflecting the similar GFP expression profiles across  
288 both interpromoter distances. This is an indication that the effect of RNAP cooperativity to  
289 facilitate dislodging the roadblock might only be effective when the dissociation constant of the  
290 roadblocking protein at the downstream TIM is small—that RNAP cooperation effects are only  
291 notable when the downstream roadblock is strong.

292 Further increasing LacI  $K_D$  to 0.21 pM for a pTet-pLac separation of 47 bp lead to a higher GFP  
293 expression in the basal and aTc only conditions, compared to pAE\_LG23, while not significantly  
294 affecting the GFP levels at IPTG only or aTc+IPTG (Fig 5b, pAE\_LG26). This increased basal  
295 expression is likely due to leaky expression at pLac. Since this construct's gene expression was  
296 low only when both inducers were absent and high in the other three conditions, it closely  
297 resembles an OR gate. Accordingly, for this improved construct,  $d_{00}$  showed a reduction of ~2-  
298 fold compared to our initial attempt to create OR behavior (Fig 5b and Supplementary Table S7,  
299 pAE\_LG15 and pAE\_LG26). The triangle plot containing the OR constructs similarly shows the  
300 trend towards pure OR gate behavior with increasing LacI  $K_D$  (Fig. 5c). In addition, the difference  
301 between the lowest ON state (aTc only) and the highest ON state (aTc+IPTG) was only  $5.6 \pm 1.7$ -  
302 fold, which is smaller than the difference between the OFF state (basal) and the lowest ON state  
303 (aTc only).

304 When LacI  $K_D$  was increased to 2.34 pM, effectively abolishing the LacI roadblock, we observe a  
305 loss of OR behavior (Fig. 5b, pAE\_LG27). This dramatic change in behavior can be attributed to  
306 the increase in leaky transcription in the absence of aTc and IPTG. Taken together, these results  
307 suggest that optimal OR behavior is achieved at moderate LacI  $K_D$  values that permit some  
308 readthrough from the upstream promoter but effectively block leaky transcription at the  
309 downstream TIM (Fig. 5b, 5c).

310 Though it is clear that increasing LacI  $K_D$  permits readthrough from the upstream pTet, it was not  
311 obvious that the trend in fractional readthrough would follow the one observed in our AND  
312 constructs (Fig. 2d). To address this, we also quantified the extent of readthrough for our OR gates  
313 using Equation 3. Intriguingly, a logarithmic correlation was also observed (Fig. 5d). The trend in  
314 fractional readthrough and LacI  $K_D$  was comparable to the one observed for the AND category  
315 (Supplementary Figure S2), suggesting that despite LacI's dual purpose in roadblock and in RNAP

316 occlusion, LacI  $K_D$  influences upstream RNAP readthrough in a manner similar to that of our AND  
317 constructs.

### 318 **Tuning inducer concentrations improves OR gate behavior**

319 Just as the AND construct performance was sensitive to the relative strength of the promoter and  
320 operator parts and performed best (lowest  $d_{10}$ ) at sub-saturating aTc and IPTG conditions, the  
321 relative strength of the tandem promoters in our OR constructs can be tuned to improve OR gate  
322 performance. For constructs with moderately high LacI  $K_D$  values—pAE\_LG26 ( $K_D=0.21$  pM),  
323 for instance—we find that OR gate performance is best ( $d_{00}$  is lowest) at high aTc and low IPTG  
324 concentrations (Fig. 6a). At these conditions, gate asymmetry is minimized since the upstream  
325 pTet requires high activation to read through the LacI roadblock. Thus, high aTc and low IPTG  
326 equalizes the relative GFP contributions from both promoters, creating more OR-like behavior.  
327 There is a strong trend in  $d_{00}$  with aTc concentration, since low pTet activity with a LacI roadblock  
328 produces a consistently low signal (Fig 6a). This trend is seen for all OR constructs (Supplementary  
329 Figures S19-S24) except pAE\_LG27, which has a very high LacI  $K_D$  value ( $K_D=2.34$  pM) and  
330 does not respond to IPTG (Fig. 5d, 6a).

331 On a triangle plot of pAE\_LG26 at varying aTc and IPTG conditions, OR constructs are clustered  
332 primarily by aTc concentration, again demonstrating the importance for high pTet strength in its  
333 upstream position (Fig. 6b). Within each cluster, low IPTG conditions trend toward more OR-like  
334 behavior, largely due to the equality of pTet and pLac strength at these conditions. Visualizing all  
335 conditions from all OR constructs on a single triangle plot shows that moderate LacI  $K_D$  values  
336 show more OR-like behavior, where low LacI  $K_D$  constructs trend toward IPTG single-input gate  
337 behavior (Fig. 6c).

338 Plotting OR behaviors for each construct at conditions that minimize  $d_{00}$ , it is qualitatively apparent  
339 that OR behavior is improved at sub-saturating IPTG concentrations (Fig 6d). The best OR gate at  
340 saturating conditions, pAE\_LG26, is improved with a reduction in  $d_{00}$  of 0.4 to 0.28  
341 (Supplementary Table S7). Though these OR-optimal conditions reduce the dynamic range  
342 compared with saturating inducer conditions (Fig 6a), the emergence of more OR-like behavior  
343 may in some cases be more important than a large regulatory range. Thus, this optimization of gate  
344 behaviors should be considered alongside regulatory range when designing dual-input logic gates.

## 345 **Mathematical modeling of OR gate behavior**

346 Modeling OR gate behavior suggests potential roadblock effects and RNAP interactions between  
347 tandem promoters. First, transfer functions describing promoter occupancy were derived similarly  
348 to the transfer functions describing promoter and operator occupancy for AND gates, though here  
349  $TF_{\text{LacO}}$  is replaced with  $TF_{\text{pLac}}$  to represent the change in gate architecture (Fig. 7a, Supplementary  
350 Information section OR Gate Model Equation Derivations). Model equations used to fit OR gate  
351 behavior were derived considering the relative contributions of tandem promoters (Fig. 7a). Tamsir  
352 *et al.* had previously used a model equation accounting for the interference of upstream and  
353 downstream promoters ( $a_{\text{pTet}}$  and  $a_{\text{pLac}}$ ) with the maximum GFP expression from that promoter  
354 ( $X_{\text{pTet}}$  and  $X_{\text{pLac}}$ ) and the transfer functions describing promoter occupancy<sup>39</sup>. We found that this  
355 model equation adequately described our OR gates— it provided the fit with the lowest AIC  
356 value—and fit inducer-dependent GFP expression with an  $R^2$  of 0.95 (Fig. 7b).  $R^2$  values for fits  
357 to other constructs range from 0.61-0.98 (Supplementary Figures S25-S30).

358 This model equation also revealed insights into potential interference and interactions between  
359 gates (Fig. 7a-b, see also Supplementary section OR Gate Modeling Derivation, Supplementary  
360 Table S23, and Supplementary Figures S25-S30). For example, the weight term describing the  
361 relative pLac contributions,  $a_{\text{pLac}}$ , was in general significantly higher than  $a_{\text{pTet}}$ , suggesting that the  
362 downstream pLac promoter interferes with the upstream pTet, either through RNAP interactions  
363 or through the LacI roadblock. The latter mode of interference may explain the trend in increasing  
364  $a_{\text{pTet}}$  with increasing LacI  $K_D$  values (Supplementary Tables S2 and S23); the former may explain  
365 how the construct pAE\_LG27, with a LacO  $K_D$  of 2.34 pM and high GFP expression under basal  
366 conditions (Fig. 5b), still has an  $a_{\text{pLac}}$  value over 3-fold higher than  $a_{\text{pTet}}$ . Additionally, that these  
367 promoter weight values are below 1 suggests some level of interference between the tandem  
368 promoters, since the combined tandem promoter activities are not simply additive.

369 Here we have shown that OR behavior can be obtained by fine tuning the components of a pair of  
370 tandem promoters. Importantly, our results suggest that mutating the DNA recognition sequence  
371 of the transcriptional factor controlling the activity of the downstream promoter in a set of two  
372 tandem promoters is a more effective way to modulate TI and achieve OR behavior than increasing  
373 the inter-promoter distance.

374

## 375 DISCUSSION

376 The presence of TI in naturally occurring systems has brought interest in the modeling and  
377 engineering of this regulatory phenomenon. Here, making use of two different TIMs downstream  
378 of an inducible pTet promoter we have been able to create AND and OR behaviors in a rational  
379 manner. Recently, Hao *et al.* showed how increasing LacI  $K_D$  strongly increased readthrough,  
380 doing so in a more effective manner than decreasing LacI concentration<sup>22</sup>—an observation that is  
381 in agreement with our experiments— demonstrating that tuning LacI  $K_D$  is the most efficient  
382 manner to tune roadblock. In addition, our results regarding the different pTet-pLac separations  
383 also agree with the observations of Epshtein *et al.* that demonstrated how during a roadblock event  
384 the trailing EC helps the blocked complex to read through the roadblock site by keeping it in the  
385 active state. This is because once the blocked EC assumes its active configuration, it has a chance  
386 to move through the roadblock as soon as the latter dissociates<sup>21</sup>. This mechanism could also  
387 explain the observation that as LacI  $K_D$  was increased in the AND and OR constructs, higher GFP  
388 expression was obtained when only aTc was added to the system because of the higher chances of  
389 escape of the ECs through the roadblock due to the more frequent unbinding events of the  
390 roadblocking protein. However, an alternative mechanism could be that stalled ECs actively  
391 dislodge the roadblocking protein and this action is increasingly favored as LacI  $K_D$  becomes  
392 larger. Thus, it remains unknown whether LacI dissociation and consequent readthrough of an EC  
393 occurs via a passive mechanism (ECs are just able to readthrough by waiting for spontaneous  
394 roadblock unbinding) or an active mechanism (ECs promote dislodgement of LacI), or a  
395 combination of both.

396 Using LacI and cAMP receptor protein (CRP) to control gene expression, Mayo *et al.*<sup>43</sup> showed  
397 how point mutations in the operator sites of each transcription factor changed the production of  
398 GFP. Their studies focused on experimentally demonstrating the plasticity of the input function of  
399 gene expression. A similar approach was used by Cox *et al.*<sup>34</sup> to construct a library of activation-  
400 repression and repression-repression promoters that ranged in their observed behavior from SIG  
401 to AND gates. Here, for the first time, we have been able to demonstrate this plasticity of the input  
402 function using rationally *de novo* engineered constructs by converting an initially AND gate to an  
403 aTc gate, and an IPTG gate into an OR gate (Fig. 2b; Fig. 5a, b). We show that rationally changing  
404 LacI  $K_D$  and inducer concentrations modulates TI and tunes AND and OR logic behaviors.

405 We have shown that both the position of operators of a certain transcription factor and the existence  
406 of point mutations in such operator sequences can affect the gene expression pattern of multi-input  
407 genetic devices. Our experimental observations indicate that diversification of transcription factor  
408 regulation is indeed readily achievable by DNA mutations or the insertion/deletion of small DNA  
409 fragments in the regulatory region. The binding of the same transcription factor to two slightly  
410 different sequences upstream of two different genes could result in disparate gene expression. This  
411 has important consequences on how we understand the design of synthetic genetic circuits in cells.  
412 Orthogonality between the new or existing parts of devices in a cell or its own cellular machinery  
413 is often considered essential for the good functioning of the synthetic device. However, our results  
414 indicate that a defined set of genetic elements can actually lead to various gene expression patterns,  
415 emphasizing that cells could use a certain transcription factor to obtain different responses  
416 depending on how it is arranged to other genetic elements and their relative strengths.

417 Moreover, the different degrees of readthrough observed at various LacI  $K_D$  values hint at how a  
418 downstream roadblock could be a mechanism utilized by microorganisms to fine-tune the  
419 expression of a gene under the transcription of either a constitutive promoter or an inducible  
420 promoter at a certain induction level. For example, increasing the number of transcription factors  
421 in the *cis*-regulatory region of a gene can increase its complexity in a small genetic space. In  
422 addition, the recent finding that promoters can rapidly evolve throughout the genome raises the  
423 prospect of interactions between neighboring promoters through pervasive transcription<sup>44</sup>. Our  
424 results suggest that interplay between tandem RNAPs and RNAP interactions with protein  
425 roadblocks could allow nature to sample diverse gene expression profiles and tune as needed. Our  
426 work also highlights the ability of TI to control RNAP traffic to create and tune logic behaviors  
427 for synthetic biology while also exploring fundamental regulatory dynamics of RNAP-  
428 transcription factor and RNAP-RNAP interactions.

## 429 **ACKNOWLEDGEMENTS**

430 The authors wish to acknowledge Basells Fellowship given to A.E.B., GAANN fellowship given  
431 to N.J.O. through the Department of Education, and the S10ODO21601 grant given to the Flow  
432 Cytometry Facility of the University of Colorado Boulder, and the National Science Foundation  
433 grant number MCB1714564 to A.C.

## 434 **AUTHOR CONTRIBUTIONS**

435 A.E.B and A.C conceived of the study and designed the experiments. A.E.B designed the  
436 constructs and performed the experiments. N.J.O performed mathematical modeling. A.E.B,  
437 N.J.O, and A.C wrote the manuscript.

#### 438 **CONFLICT OF INTEREST STATEMENT**

439 There are no conflicts of interest.

#### 440 **MATERIALS AND METHODS**

##### 441 **Strains, Plasmids and cell culture**

442 Constructs designed for AND behavior were cloned into pZE21MCS (Expressys). Sall and BamHI  
443 were used for the insertion of GFP, while the LacO operator site was inserted between KpnI and  
444 Sall, making the LacO sequence exchangeable for modified sequences with different LacI  
445 dissociation constants<sup>33</sup>. Polymerase Chain Reaction (PCR) primers for inserting different LacO  
446 sites and pLac were purchased from Integrated DNA Technologies (IDT) and Life Technologies  
447 (Thermo Fisher). GFP was obtained from pAKgfp1 (Addgene #14076). For a list of inserted LacO  
448 sequences see Supplementary Table S1. The LacO fragment was then replaced with pLac  
449 containing different LacO sequences in order to create OR behavior (Supplementary Table S2).  
450 The separation between pTet and pLac was increased by the inserting DNA fragments of random  
451 sequence between EcoRI and KpnI (Supplementary Table S3).

452 Cloning and experiments to show logic behavior using TI with GFP were done in *E. coli* strain  
453 DH5 $\alpha$ Z1 (Expressys). Transformation colonies were grown in Luria-Bertani (LB) and agar plates  
454 supplemented with kanamycin (50  $\mu$ g/mL).

##### 455 **GFP induction assays**

456 Individual colonies were picked from LB and agar plates supplemented with 50  $\mu$ g/mL kanamycin  
457 and incubated for 16 h at 37 °C under orbital shaking at 200 rpm. Then, the cells were diluted 1:10  
458 into fresh LB media supplemented with 50  $\mu$ g/mL kanamycin. Induction was performed at various  
459 inducer concentrations using anhydrous tetracycline (aTc), (0, 10, 20, 30 or 50 ng/mL) and  
460 isopropyl  $\beta$ -D-1-thiogalactopyranoside (IPTG), (0, 0.01, 0.02, 0.5 or 1 mM), creating a matrix of  
461 25 different inducer combinations. Cells were grown for 6 h at 37 °C under shaking in a flat bottom  
462 96-well plate in a microplate reader (Tecan Genios). Optical density at 590 nm was measured



463 during induction. Following the growth period, the cells were transferred to a V-bottom 96-well  
464 plate and pelleted by centrifugation of the plate at 4000 rpm for 10 min at 4 °C. The supernatant  
465 was removed by vigorously inverting the plate and then the pellets were re-suspended in 100  $\mu$ L  
466 PBS each. The centrifugation and supernatant removal processes were repeated and then each  
467 pellet was re-suspended in 100  $\mu$ L PBS+4% formaldehyde and the plate was stored at 4 °C.

#### 468 **Flow cytometry**

469 Before fluorescence measurements conducted with a FACSCelesta instrument, samples were  
470 diluted 1:50 in PBS. The 588B 530/30V (800 V) channel was used to measure GFP levels.  
471 FSC-V=420 V, SSC-V=260 V, FSC-Threshold= 8000, SSC-Threshold= 200. For each sample,  
472 50,000 cells were measured. At least four biological replicates were collected for each construct.  
473 Data was analyzed using MATLAB. Statistical differences were examined using the  
474 Mann-Whitney  $U$  test.

#### 475 **Mathematical characterization of logic behavior**

476 To measure the logic gate behavior of the engineered TI constructs, it was useful to characterize  
477 their GFP reporter expression using a previously developed mathematical model that classified the  
478 behavior of each construct into a certain type of ‘pure’ or ‘hybrid’/asymmetric logic gate<sup>34</sup>. Such  
479 model, developed by Cox *et al.*, utilizes three parameters: (i) regulatory range,  $r$ , which measures  
480 the increase in gene expression using the ratio from the highest expressing condition compared to  
481 the lowest; (ii) logic,  $l$ , which quantifies whether the two intermediate expression levels are closer  
482 to the ON ( $l=1$ ) or OFF state ( $l=0$ ); and asymmetry,  $a$ , which quantifies the activation of gene  
483 expression caused by each inducer. Greater  $a$  values indicate that the device is more responsive to  
484 only one of the two inducers. Asymmetry varies between 0 and 1, with 0 indicating the gate  
485 responds equally to both, and 1 indicating the gate responds only to one. The parameters  $a$ ,  $l$ , and  
486  $r$  are defined mathematically in Equations S11-S13. We expanded the previously existing model  
487 by calculating the Euclidian distance,  $d_{la}$ , between the  $a$  and  $l$  values observed for a certain  
488 construct ( $a_{\text{obs}}$ ,  $l_{\text{obs}}$ ) and the  $a$  and  $l$  values corresponding to the desired behavior. The parameter  
489  $d_{la}$  can range from 0 to  $\sqrt{1.25}$ . Pure AND behavior is characterized by  $l=1$  and  $a=0$ . The deviation  
490 from AND behavior is thus represented by  $d_{10}$ . In the case of an OR gate ( $l=0$ ,  $a=0$ ) the deviation  
491 is represented by  $d_{00}$ .

492 
$$d_{10} = \sqrt{(l_{obs} - 1)^2 + (a_{obs} - 0)^2} \quad (5)$$

493 
$$d_{00} = \sqrt{(l_{obs} - 0)^2 + (a_{obs} - 0)^2} \quad (6)$$

494 Experimental logic behavior is delimited to a certain parameter space defined by three pure logic  
495 gate behaviors. Constructs were assigned to their corresponding 3-gate parameter space, which is  
496 defined by their highest to lowest response at the four extreme conditions of basal, aTc only, IPTG  
497 only and aTc+IPTG. Each 3-gate parameter space can be represented in a triangular plot in which  
498 the base of the triangle corresponds to logic,  $l$ , and the height of the triangle corresponds to  
499 asymmetry,  $a$ . Since different types of logic gates can have the same  $l$  and  $a$  values, e.g. OR gate  
500 and AND gate each have  $l=0$ ,  $a=0$  because both have 3 states ON and one state OFF, then multiple  
501 parameter spaces exist, adding up to a total of 24 unique parameter spaces, e.g. 24 combinations  
502 of three pure logic gates, one with  $l=0$ ,  $a=0$ , one with  $l=1$ ,  $a=0$  and one with  $l=0.5$ ,  $a=0.5$ . For each  
503 parameter space, the behavior of a construct was classified into seven possible logic gate  
504 categories corresponding to the 3 pure gates at the corners of the triangle ( $l=0$ ,  $a=0$ ;  $l=0.5$ ,  $a=1$ ;  
505  $l=1$ ,  $a=0$ ), 3 asymmetric gates ( $l=0.25$ ,  $a=0.5$ ;  $l=0.5$ ,  $a=0.5$ ;  $l=0.75$ ,  $a=0.5$ ) and the pure SLOPE  
506 gate ( $l=0.5$ ,  $a=0$ ) depending on which of these seven was closest to their observed behavior. The  
507 truth tables for the logic states defining these parameter spaces are reported in Supplementary  
508 Table S4; the possible logic parameter spaces resulting from each observed GFP expression profile  
509 is reported in Supplementary Table S5.

510 **Triangular AND gate plots:** For constructs designed to behave as AND gates, i.e. pTet-LacO  
511 architecture, we observed that, when the induction levels were 50 ng/mL aTc and 1 mM IPTG,  
512 they belonged to either the OR-AND-aTc space (all but LG01 and LG03) or the  
513 (aTc)IMPLY(IPTG)-AND-aTc space (henceforth (a)I(I)-AND-aTc) (see Supplementary Table S4  
514 for truth table for all gates described). The former is defined by the GFP expression levels being  
515 aTc+IPTG>aTc>IPTG>basal, while the latter is defined by the GFP expression levels being  
516 aTc+IPTG>aTc>basal>IPTG. This transition into different logic parameter spaces does not  
517 necessarily alter the logic behavior of a construct; different parameter spaces represent alternate  
518 possible deviations from the pure AND or OR logic behavior and highlight the versatile tunability  
519 achievable from two tandem regulatory parts (promoters or operators). (A more detailed  
520 explanation of this change is given in Supplemental section Assignment of Logic Parameter

521 Space). These logic spaces are contiguous to one another and they share the AND-aTc diagonal  
522 ( $(l=0, a=1)$ - $(l=0.5, a=1)$  diagonal) while their  $l=0, a=0$  condition differs (either OR behavior or  
523  $(aTc)IMPLY(IPTG)$ ). The behaviors of the constructs fell either in the category of asymmetric  
524 AND gate ( $l=0.75, a=0.5$ ) or aTc gate ( $l=0.5, a=1$ ). With the best AND gate behavior observed for  
525 pAE\_LG01 ( $l=0.85, a=0.28, d_{10}=0.32$ ), (Fig. 2b, c). The corresponding  $d_{10}$  values for all tested  
526 constructs with pTet-LacO architecture can be found in Supplementary Table S6.

527 **Triangular OR gate plots:** For the OR gates ( $l=0, a=0$ ), i.e. pTet-pLac architecture, when the  
528 induction levels were 50 ng/mL aTc and 1 mM IPTG, the constructs belonged to the  
529 OR-AND-IPTG space ( $GFP_{aTc+IPTG}>GFP_{IPTG}>GFP_{aTc}>GFP_{basal}$ ) with the exception of control  
530 construct pAE\_LG27 which belonged to the OR-AND-aTc space. The constructs of the  
531 OR-AND-IPTG space were categorized as either asymmetric SLOPE gate ( $l=0.5, a=0.5$ ) or  
532 asymmetric OR gate ( $l=0.25, a=0.5$ ). In this case, the construct with the best-performing OR logic  
533 was pAE\_LG26 ( $l=0.31, a=0.25, d_{00}=0.40$ ), (Fig. 4b, c). The corresponding  $d_{00}$  values for all tested  
534 constructs with pTet-pLac architecture can be found in Supplementary Table S7.

535 This type of mathematical analysis is useful to determine the quality of the desired logic behavior,  
536 and it also helps demonstrate the plasticity of constructs that share a certain type of promoter  
537 architecture in the logic gates parameter space<sup>43</sup>. To further demonstrate this plasticity, we applied  
538 the previously described analysis to all possible combinations of inducer conditions tested.  
539 Keeping the basal condition at 0 ng/mL aTc and 0 mM IPTG, we considered the “high” aTc  
540 condition to be either 10, 20, 30 or 50 ng/mL and the “high” IPTG condition to be either 0.01,  
541 0.02, 0.5 or 1 mM. This results in 16 possible combinations of four “extreme” points. Sometimes  
542 this resulted in the tested conditions for a certain construct belonging to different logic parameter  
543 spaces (see Supplementary section Assignment of Logic Parameter Space, Supplementary Tables  
544 S8-S21).

### 545 **Transfer function modeling**

546 Transfer functions were derived as described in Supplemental Information section Mathematical  
547 Model Derivation and Supplementary Figure S1 and assembled in model equations to fit AND and  
548 OR gate data. These transfer function derivations and model equations are defined in Equations  
549 S1-S10. Model equations were fit to experimental data using lsqcurvefit in MATLAB using a  
550 custom script. Several parameters— $K_{a,TetR:TetO}$ ,  $K_{a,IPTG:LacI}$ ,  $[LacI]$ ,  $[TetR]$ ,  $[RNAP]$ , and in some

551 cases, the Hill coefficients  $m$ ,  $n$ —were held constant to literature values (see Supplementary Table  
552 S22) in order to compare fitted parameters with experimentally observed values. Goodness of fit  
553 statistics from all best fits are available in Supplementary Figures S11-18, S25-S30. To compare  
554 model equations and prevent overfitting, we compared Akaike Information Criterion (AIC) values  
555 corresponding to each fit, which were calculated in MATLAB. AIC values for all fits are available  
556 in Supplementary Tables S24-S25.

557

## 558 REFERENCES

- 559 (1) Brophy, J. A. N.; Voigt, C. A. Principles of Genetic Circuit Design. *Nat. Methods* **2014**,  
560 *11* (5), 508–520. <https://doi.org/10.1038/nmeth.2926>.
- 561 (2) Cardinale, S.; Joachimiak, M. P.; Arkin, A. P. Report Effects of Genetic Variation on the  
562 *E. Coli* Host-Circuit Interface. *CellReports* **2013**, *4* (2), 231–237.  
563 <https://doi.org/10.1016/j.celrep.2013.06.023>.
- 564 (3) Klumpp, S.; Zhang, Z.; Hwa, T. Theory Growth Rate-Dependent Global Effects on Gene  
565 Expression in Bacteria. *Cell* **2009**, *139* (7), 1366–1375.  
566 <https://doi.org/10.1016/j.cell.2009.12.001>.
- 567 (4) Moser, F.; Broers, N. J.; Hartmans, S.; Tamsir, A.; Kerkman, R.; Roubos, J. A.;  
568 Bovenberg, R.; Voigt, C. A. Genetic Circuit Performance under Conditions Relevant for  
569 Industrial Bioreactors. **2012**. <https://doi.org/10.1021/sb3000832>.
- 570 (5) Hooshangi, S.; Thiberge, S.; Weiss, R. Ultrasensitivity and Noise Propagation in a  
571 Synthetic Transcriptional Cascade. *Proc. Natl. Acad. Sci. U. S. A.* **2005**, *102* (10), 3581–  
572 3586. <https://doi.org/10.1073/pnas.0408507102>.
- 573 (6) Moon, T. S.; Lou, C.; Tamsir, A.; Stanton, B. C.; Voigt, C. A. Genetic Programs  
574 Constructed from Layered Logic Gates in Single Cells. *Nature* **2012**, *491* (7423), 249–  
575 253. <https://doi.org/10.1038/nature11516>.
- 576 (7) Stanton, B. C.; Nielsen, A. A. K.; Tamsir, A.; Clancy, K.; Peterson, T.; Voigt, C. A.  
577 Genomic Mining of Prokaryotic Repressors for Orthogonal Logic Gates. *Nat. Chem. Biol.*  
578 **2014**, *10* (2), 99–105. <https://doi.org/10.1038/nchembio.1411>.

- 579 (8) Shearwin, K. E.; Callen, B. P.; Egan, J. B. Transcriptional Interference--a Crash Course.  
580 *Trends Genet.* **2005**, *21* (6), 339–345. <https://doi.org/10.1016/j.tig.2005.04.009>.
- 581 (9) Wurtzel, O.; Sapra, R.; Chen, F.; Zhu, Y.; Simmons, B. A.; Sorek, R. A Single-Base  
582 Resolution Map of an Archaeal Transcriptome. *Genome Res.* **2010**, *20* (1), 133–141.  
583 <https://doi.org/10.1101/gr.100396.109>.
- 584 (10) Dornenburg, J. E.; DeVita, A. M.; Palumbo, M. J.; Wade, J. T. Widespread Antisense  
585 Transcription in Escherichia Coli. *MBio* **2010**, *1* (1), e00024-10-e00024-10.  
586 <https://doi.org/10.1128/mBio.00024-10>.
- 587 (11) Hongay, C. F.; Grisafi, P. L.; Galitski, T.; Fink, G. R. Antisense Transcription Controls  
588 Cell Fate in *Saccharomyces Cerevisiae*. *Cell* **2006**, *127* (4), 735–745.  
589 <https://doi.org/10.1016/j.cell.2006.09.038>.
- 590 (12) Yelin, R.; Dahary, D.; Sorek, R.; Levanon, E. Y.; Goldstein, O.; Shoshan, A.; Diber, A.;  
591 Biton, S.; Tamir, Y.; Khosravi, R.; et al. Widespread Occurrence of Antisense  
592 Transcription in the Human Genome. *Nat. Biotechnol.* **2003**, *21* (4), 379–386.  
593 <https://doi.org/10.1038/nbt808>.
- 594 (13) Katayama, S.; Tomaru, Y.; Kasukawa, T.; Waki, K.; Nakanishi, M.; Nakamura, M.;  
595 Nishida, H.; Yap, C. C.; Suzuki, M.; Kawai, J.; et al. Antisense Transcription in the  
596 Mammalian Transcriptome. *Science* (80-. ). **2005**, *309* (5740), 1564–1566.  
597 <https://doi.org/10.1126/science.1112009>.
- 598 (14) Chatterjee, A.; Johnson, C. M.; Shu, C.-C.; Kaznessis, Y. N.; Ramkrishna, D.; Dunny, G.  
599 M.; Hu, W.-S. Convergent Transcription Confers a Bistable Switch in *Enterococcus*  
600 *Faecalis* Conjugation. *Proc. Natl. Acad. Sci. U. S. A.* **2011**, *108* (23), 9721–9726.  
601 <https://doi.org/10.1073/pnas.1101569108>.
- 602 (15) Bordoy, A. E.; Chatterjee, A. Cis-Antisense Transcription Gives Rise to Tunable Genetic  
603 Switch Behavior: A Mathematical Modeling Approach. *PLoS One* **2015**, *10* (7),  
604 e0133873. <https://doi.org/10.1371/journal.pone.0133873>.
- 605 (16) Sneppen, K.; Dodd, I. B.; Shearwin, K. E.; Palmer, A. C.; Schubert, R. a; Callen, B. P.;  
606 Egan, J. B. A Mathematical Model for Transcriptional Interference by RNA Polymerase

- 607 Traffic in Escherichia Coli. *J. Mol. Biol.* **2005**, *346* (2), 399–409.  
608 <https://doi.org/10.1016/j.jmb.2004.11.075>.
- 609 (17) Brophy, J. A. N.; Voigt, C. A. Antisense Transcription as a Tool to Tune Gene  
610 Expression. **2016**, 1–14.
- 611 (18) Bordoy, A. E.; Varanasi, U. S.; Courtney, C. M.; Chatterjee, A. Transcriptional  
612 Interference in Convergent Promoters as a Means for Tunable Gene Expression. *ACS*  
613 *Synth. Biol.* **2016**, *acssynbio.5b00223*. <https://doi.org/10.1021/acssynbio.5b00223>.
- 614 (19) Hoffmann, S. A.; Kruse, S. M.; Arndt, K. M. Long-Range Transcriptional Interference in  
615 E. Coli Used to Construct a Dual Positive Selection System for Genetic Switches. *Nucleic*  
616 *Acids Res.* **2016**, *44* (10), 1–12. <https://doi.org/10.1093/nar/gkw125>.
- 617 (20) Hoffmann, S. A.; Hao, N.; Shearwin, K. E.; Arndt, K. M. Characterizing Transcriptional  
618 Interference between Converging Genes in Bacteria. **2019**.  
619 <https://doi.org/10.1021/acssynbio.8b00477>.
- 620 (21) Epshtein, V.; Toulmé, F.; Rahmouni, A. R.; Borukhov, S.; Nudler, E. Transcription  
621 through the Roadblocks: The Role of RNA Polymerase Cooperation. *EMBO J.* **2003**, *22*  
622 (18), 4719–4727. <https://doi.org/10.1093/emboj/cdg452>.
- 623 (22) Hao, N.; Krishna, S.; Ahlgren-Berg, A.; Cutts, E. E.; Shearwin, K. E.; Dodd, I. B. Road  
624 Rules for Traffic on DNA—Systematic Analysis of Transcriptional Roadblocking in  
625 Vivo. *Nucleic Acids Res.* **2014**, *42* (14), 8861–8872. <https://doi.org/10.1093/nar/gku627>.
- 626 (23) Callen, B. P.; Shearwin, K. E.; Egan, J. B. Transcriptional Interference between  
627 Convergent Promoters Caused by Elongation over the Promoter. *Mol. Cell* **2004**, *14* (5),  
628 647–656. <https://doi.org/10.1016/j.molcel.2004.05.010>.
- 629 (24) Adhya, S.; Gottesman, M. Promoter Occlusion: Transcription through a Promoter May  
630 Inhibit Its Activity. *Cell* **1982**, *29* (July), 939–944. [https://doi.org/10.1016/0092-](https://doi.org/10.1016/0092-8674(82)90456-1)  
631 [8674\(82\)90456-1](https://doi.org/10.1016/0092-8674(82)90456-1).
- 632 (25) Palmer, A. C.; Ahlgren-Berg, A.; Egan, J. B.; Dodd, I. B.; Shearwin, K. E. Potent  
633 Transcriptional Interference by Pausing of RNA Polymerases over a Downstream  
634 Promoter. *Mol. Cell* **2009**, *34* (5), 545–555. <https://doi.org/10.1016/j.molcel.2009.04.018>.

- 635 (26) Greger, I. H.; Aranda, a; Proudfoot, N. Balancing Transcriptional Interference and  
636 Initiation on the GAL7 Promoter of *Saccharomyces Cerevisiae*. *Proc. Natl. Acad. Sci. U.*  
637 *S. A.* **2000**, *97* (15), 8415–8420. <https://doi.org/10.1073/pnas.140217697>.
- 638 (27) Greger, I. H.; Demarchi, F.; Giacca, M.; Proudfoot, N. J. Transcriptional Interference  
639 Perturbs the Binding of Sp1 to the HIV-1 Promoter. *Nucleic Acids Res.* **1998**, *26* (5),  
640 1294–1300. <https://doi.org/10.1093/nar/26.5.1294>.
- 641 (28) Prescott, E. M.; Proudfoot, N. J. Transcriptional Collision between Convergent Genes in  
642 Budding Yeast. *Proc. Natl. Acad. Sci. U. S. A.* **2002**, *99* (13), 8796–8801.  
643 <https://doi.org/10.1073/pnas.132270899>.
- 644 (29) Brophy, J. A. N.; Voigt, C. A. Antisense Transcription as a Tool to Tune Gene Expression  
645 Appendix Figures :
- 646 (30) Crampton, N.; Bonass, W. A.; Kirkham, J.; Rivetti, C.; Thomson, N. H. Collision Events  
647 between RNA Polymerases in Convergent Transcription Studied by Atomic Force  
648 Microscopy. *Nucleic Acids Res.* **2006**, *34* (19), 5416–5425.  
649 <https://doi.org/10.1093/nar/gkl668>.
- 650 (31) Lutz, R.; Bujard, H. Independent and Tight Regulation of Transcriptional Units in  
651 *Escherichia Coli* via the LacR / O , the TetR / O and AraC / I 1 -I 2 Regulatory Elements.  
652 *Nucleic Acids Res.* **1997**, *25* (6), 1203–1210.
- 653 (32) Deuschle, U.; Kammerer, W.; Gentz, R.; Bujard, H. Promoters of *Escherichia Coli*: A  
654 Hierarchy of in Vivo Strength Indicates Alternate Structures. *EMBO J.* **1986**, *5* (11),  
655 2987–2994.
- 656 (33) Betz, J. L.; Sasmor, H. M.; Buck, F.; Insley, M. Y.; Caruthers, M. H. Base Substitution  
657 Mutants of the Lac Operator: In Vivo and in Vitro Affinities for Lac Repressor. *Gene*  
658 **1986**, *50* (1–3), 123–132. [https://doi.org/10.1016/0378-1119\(86\)90317-3](https://doi.org/10.1016/0378-1119(86)90317-3).
- 659 (34) Cox, R. S.; Surette, M. G.; Elowitz, M. B. Programming Gene Expression with  
660 Combinatorial Promoters. *Mol. Syst. Biol.* **2007**, *3* (145), 145.  
661 <https://doi.org/10.1038/msb4100187>.
- 662 (35) Hill, A. V. The Possible Effects of the Aggregation of the Molecule of Hemoglobin on Its

- 663 Dissociation Curves. *J. Physiol.* **1910**, *40*, iv–vii.  
664 <https://doi.org/10.1017/CBO9781107415324.004>.
- 665 (36) Lederer, T.; Takahashi, M.; Hillen, W. Thermodynamic Analysis of Tetracycline-  
666 Mediated Induction of Tet Repressor by a Quantitative Methylation Protection Assay.  
667 *Anal. Biochem.* **1995**, *232* (2), 190–196. <https://doi.org/10.1006/abio.1995.0006>.
- 668 (37) Shea, M. A.; Ackers, G. K. The OR Control System of Bacteriophage Lambda. A  
669 Physical-Chemical Model for Gene Regulation. *J. Mol. Biol.* **1985**, *181* (2), 211–230.  
670 [https://doi.org/10.1016/0022-2836\(85\)90086-5](https://doi.org/10.1016/0022-2836(85)90086-5).
- 671 (38) Bozdogan, H. Model Selection and Akaike’s Information Criterion (AIC): The General  
672 Theory and Its Analytical Extensions. *Psychometrika* **1987**, *52* (3), 345–370.  
673 <https://doi.org/10.1007/BF02294361>.
- 674 (39) Tamsir, A.; Tabor, J. J.; Voigt, C. A. Robust Multicellular Computing Using Genetically  
675 Encoded NOR Gates and Chemical ‘Wires.’ *Nature* **2011**, *469* (7329), 212–215.  
676 <https://doi.org/10.1038/nature09565>.
- 677 (40) Stanton, B. C.; Nielsen, A. a K.; Tamsir, A.; Clancy, K.; Peterson, T.; Voigt, C. a.  
678 Genomic Mining of Prokaryotic Repressors for Orthogonal Logic Gates. *Nat. Chem. Biol.*  
679 **2014**, *10* (2), 99–105. <https://doi.org/10.1038/nchembio.1411>.
- 680 (41) Krummel, B.; Chamberlin, M. J. Structural Analysis of Ternary Complexes of Escherichia  
681 Coli RNA Polymerase. Deoxyribonuclease I Footprinting of Defined Complexes. *J. Mol.*  
682 *Biol.* **1992**, *225* (2), 239–250.
- 683 (42) Epshtein, V. Cooperation Between RNA Polymerase Molecules in Transcription  
684 Elongation. *Science* (80-. ). **2003**, *300* (5620), 801–805.  
685 <https://doi.org/10.1126/science.1083219>.
- 686 (43) Mayo, A. E.; Setty, Y.; Shavit, S.; Zaslaver, A.; Alon, U. Plasticity of the Cis-Regulatory  
687 Input Function of a Gene. *PLoS Biol.* **2006**, *4* (4), e45.  
688 <https://doi.org/10.1371/journal.pbio.0040045>.
- 689 (44) Yona, A. H.; Alm, E. J.; Gore, J. Random Sequences Rapidly Evolve into de Novo  
690 Promoters. *Nat. Commun.* **2018**, *9* (1), 1–10. <https://doi.org/10.1038/s41467-018-04026->



691 w.

692

693

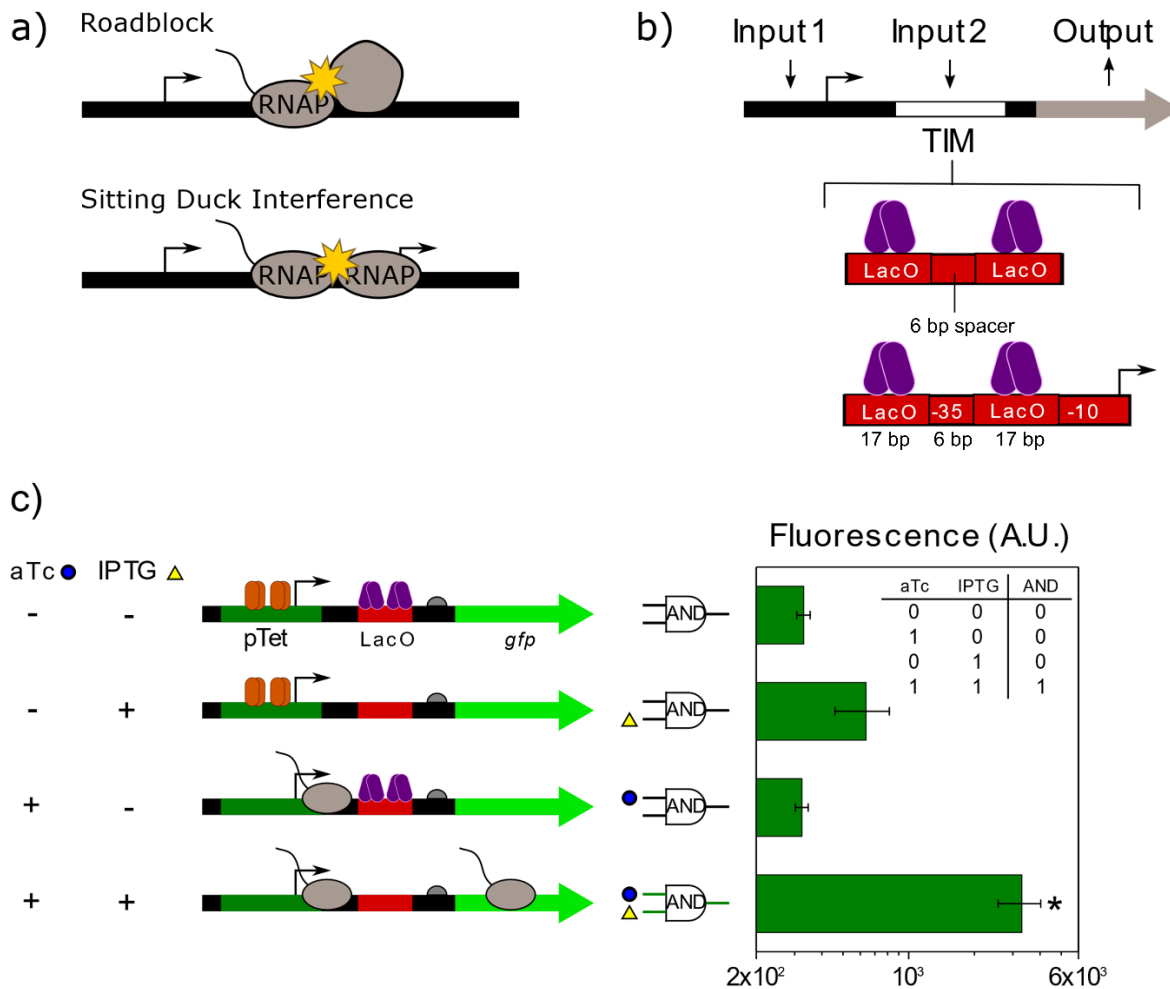

694

695 **Figure 1.** AND behavior can be created by placing a TIM composed of a strong roadblock  
 696 downstream of an inducible promoter. **a)** Transcribing ECs, shown with an associated nascent  
 697 RNA, can be intercepted by the presence of an obstacle bound to the downstream DNA. A  
 698 transcription factor bound to the DNA causes roadblock, causing an elongating RNAP to stall and  
 699 eventually terminate transcription. During sitting duck interference, an EC is prevented from  
 700 transcribing further due to the presence of an initiating RNAP (sitting duck) at a downstream  
 701 promoter. **b)** A transcriptional interference module (TIM) downstream from an inducible promoter  
 702 can be used to engineering TI-based genetic devices. Shown are the two types of TIMs used in this  
 703 study. **c)** Schematic showing how aTc and IPTG act as inputs of a genetic device designed to act  
 704 as an AND logic gate the output of which is GFP. Gene expression is only highly activated when  
 705 both inducers are present and is reduced to intermediate levels when only aTc is present due to the

706 roadblock caused by bound LacI. The truth table for an AND gate is inserted in the plot. \* indicates  
707 significant difference with the rest of conditions (Mann-Whitney  $U$  test,  $p$ -value<0.05).

708

709

710

711

712

713

714

715

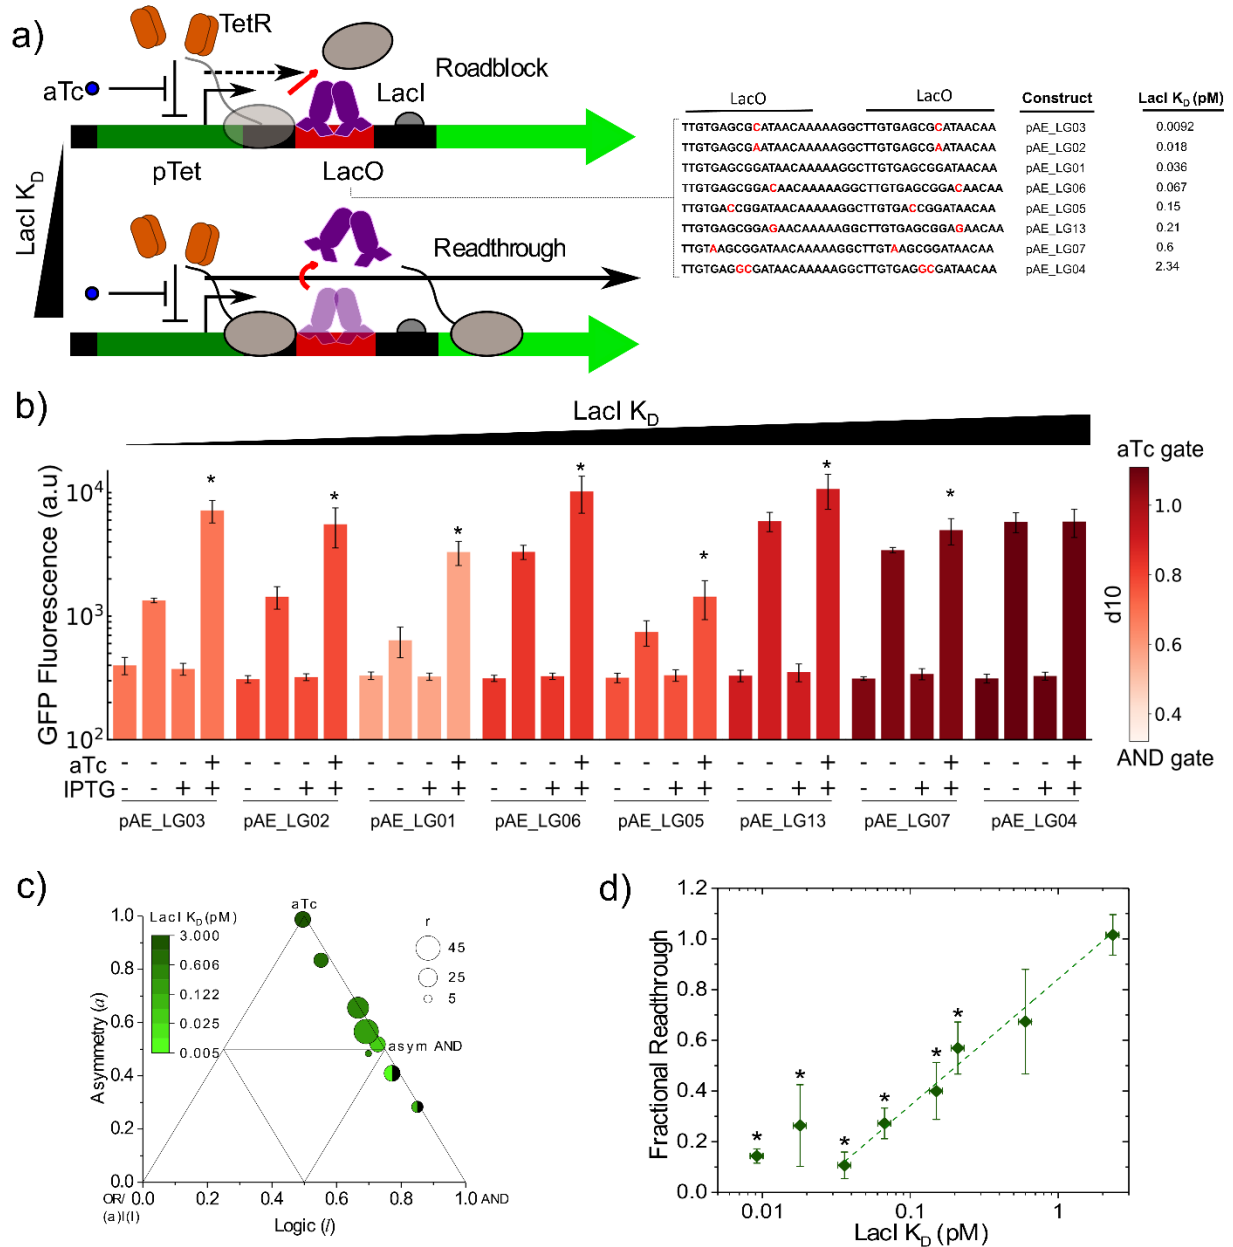

716

717 **Figure 2.** The switching from AND gate behavior to Single Input aTc Gate behavior as the  
 718 dissociation constant of LacI increases. **a)** Mutations to the LacO site changes LacI dissociation  
 719 constant,  $K_D$ , and tunes the extent of RNAP readthrough. Small LacI dissociation constant values  
 720 produce strong roadblock, which may lead to ECs falling off the DNA, stopping transcription  
 721 (dashed arrow). With increasing LacI  $K_D$  values, LacI is dislodged in a greater extent from the  
 722 DNA and transcription continues (plain arrow). **b)** GFP expression profiles for constructs with  
 723 different LacI  $K_D$  at each of the four possible inducer combinations. Darker filling indicates a  
 724 better AND behavior, measured by the value of  $d_{10}$ . \* indicates significant differences for the

725 aTc+IPTG construct with respect to the other conditions (Mann-Whitney  $U$  test,  $p$ -value $<0.05$ ).

726 **c)** Triangle plot showing the gate behaviors of AND constructs with different LacI  $K_D$  values. The

727 plot shows dynamic range,  $r$ ; the asymmetry,  $a$ , i.e. the responsiveness of the device to each input;

728 and the logic type,  $l$ , i.e. whether one, two or three input combinations result in the output being

729 ON. For a pure AND gate,  $l=1$  and  $a=0$ . The designed constructs lie in the AND-aTc gate diagonal.

730 Constructs were closer to the aTc gate vertex when LacI  $K_D$  was high, and closer to the AND

731 vertex when LacI  $K_D$  was low. Full circles belong to the OR-AND-aTc space ( $GFP_{a+I} > GFP_{aTc} >$

732  $GFP_{IPTG} > GFP_{Basal}$ ). Half circles belong to the (a)I(I)-AND-aTc space ( $GFP_{a+I} > GFP_{aTc} > GFP_{Basal} >$

733  $GFP_{IPTG}$ ). **d)** Fractional readthrough is a function of LacI  $K_D$  for values  $> \sim 0.03$  pM.

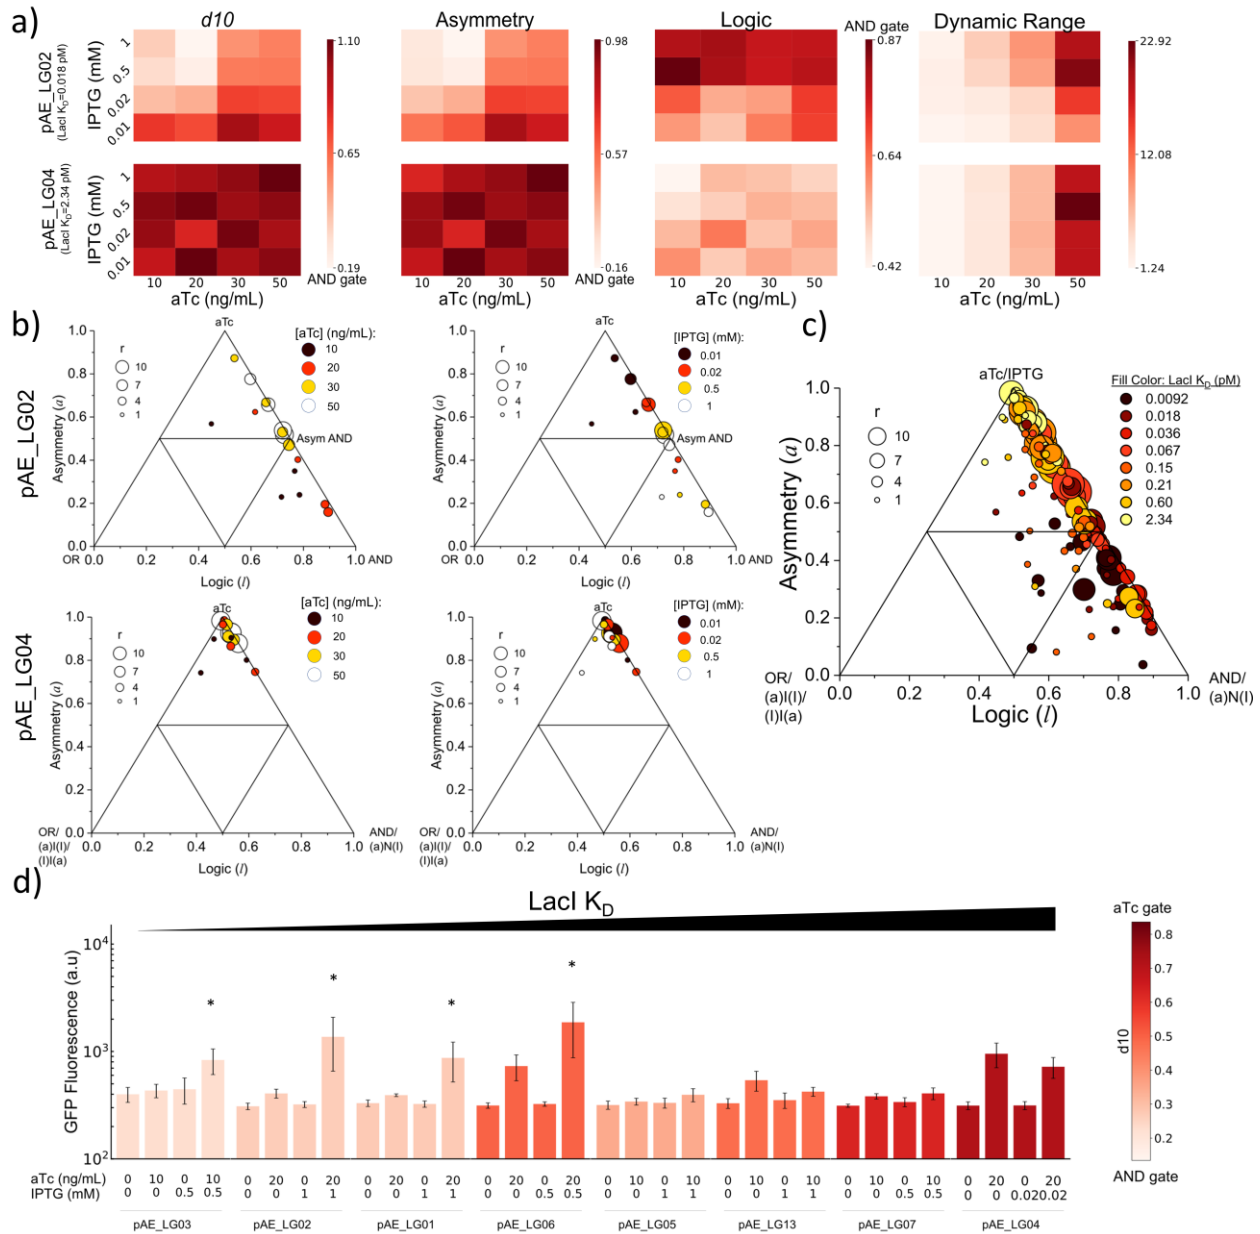

734

735 **Figure 3:** Optimization of AND gate behavior. **a)** Heat maps of logic gate analysis parameters for  
 736 varying aTc and IPTG inducer concentrations for two AND constructs—pAE\_LG02, which has a  
 737 low  $K_D$  value and pAE\_LG04, which has a high  $K_D$ . **b)** Triangle plots for pAE\_LG02 (top) and  
 738 pAE\_LG04 (bottom) showing trends in gate behavior with changing IPTG (left) and aTc (right).  
 739 All data points resulting from combinations of four inducer levels belonged to the OR-AND-aTc  
 740 space for pAE\_LG02 while for pAE\_LG04 they belonged to one of the following spaces:  
 741 (a)I(I)-AND-aTc, OR-AND-aTc, OR-(a)N(I)-aTc or (I)I(a)-(a)N(I)-aTc ((a)N(I) means  
 742 (aTc)NIMPLY(IPTG)), which share the aTc gate behavior at  $l=0.5$  and  $a=1$ . **c)** Triangle plot for

743 all 8 AND constructs at different aTc and IPTG combinations. The observed logic parameter  
744 spaces were a(I)I-AND-aTc, OR-AND-aTc, OR-AND-IPTG, OR-(a)N(I)-aTc or (I)I(a)-(a)N(I)-  
745 aTc. **d)** AND behaviors for each construct at conditions that minimize  $d_{10}$ . \* indicates significant  
746 differences in the aTc+IPTG condition with respect to the other inducer combinations shown.  
747 (Mann-Whitney  $U$  test,  $p$ -value<0.05)

748

749

750

751

752

753

754

755

756

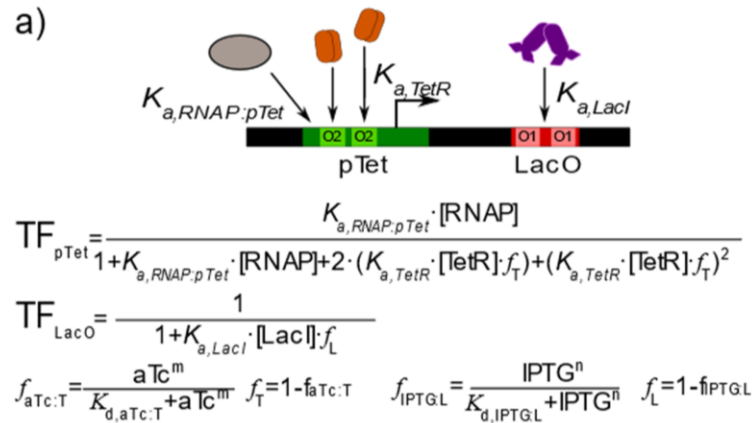

| AND Gate Models                                                                                                 | AIC  | R <sup>2</sup> |
|-----------------------------------------------------------------------------------------------------------------|------|----------------|
| $GFP_{AND} = k_{trans} \cdot TF_{pTet} \cdot TF_{LacO}$                                                         | -76  | 0.96           |
| $GFP_{AND} = k_{trans} \cdot (a \cdot TF_{pTet} \cdot TF_{LacO} + (1-a) \cdot TF_{pTet} \cdot (1 - TF_{LacO}))$ | -76  | 0.96           |
| $GFP_{AND} = k_{trans} \cdot (a \cdot TF_{pTet} \cdot TF_{LacO} + (1-a) \cdot TF_{pTet})$                       | -110 | 0.99           |

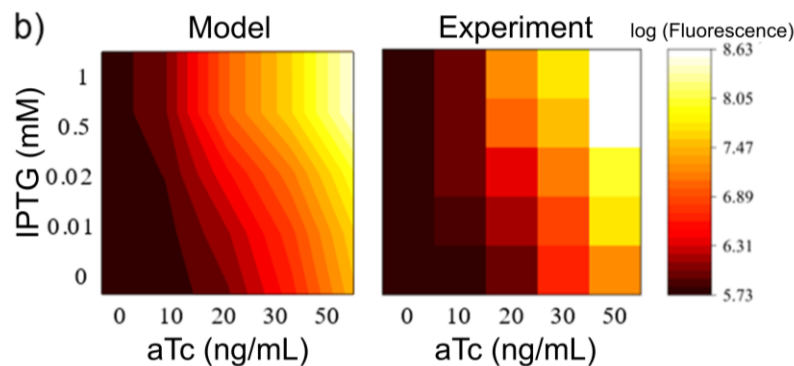

757

758 **Figure 4.** Mathematical modeling of promoter and operator occupancies captures AND behavior.

759 **a)** Schematic showing the competing binding interactions at the pTet promoter and LacO operator

760 site, with specific association constants for each protein. Transfer functions describing the

761 occupancy of the promoter or operator are derived using the Shea-Ackers formalism—partitioning

762 binding events that allow transcription in the numerator and all possible states in the denominator.

763 These parameters are assembled into model equations describing the observed gate behaviors and

764 quantified using the Akaike Information Criterion (AIC), a model selection criterion that penalizes

765 spurious parameters in the model equations, with low AIC values indicating a better fit. We find



766 find that, for pAE\_LG02, AND + Single Input aTc gate behavior yields the best fit, with an  $R^2$  of  
767 0.99. **b)** Log-transformed GFP expression data from 5 different concentrations of aTc and IPTG  
768 was used to fit the model equations.

769

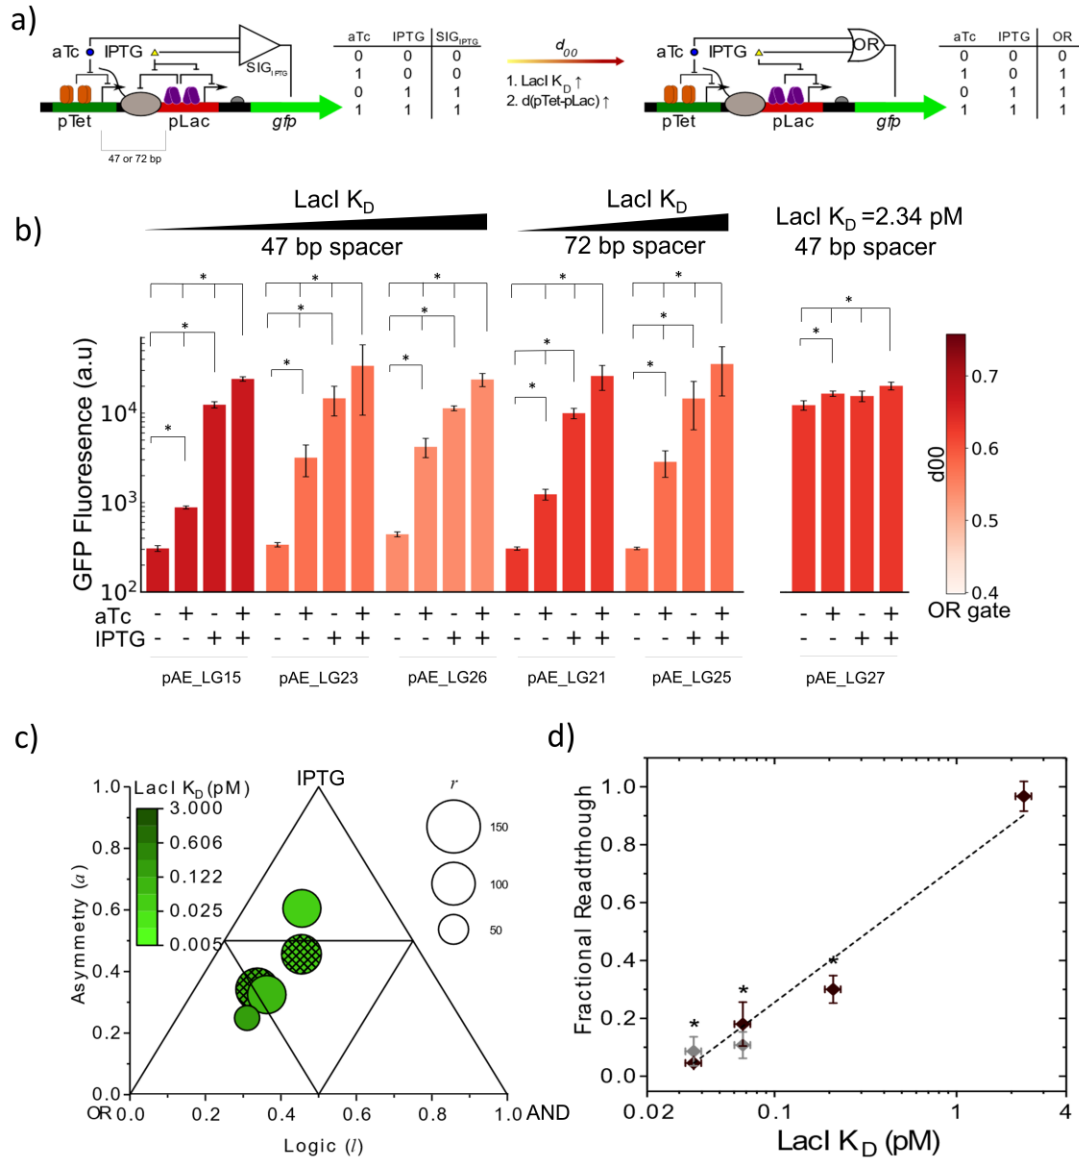

770 **Figure 5.** Tandem inducible promoters generate tunable OR logic behavior. **a)** If the roadblock  
 771 caused by a downstream TIM formed by an inducible promoter is strong, then SIG behavior is  
 772 obtained. Thus, the device only responds to the inducer of the downstream transcription factor. OR  
 773 behavior can be improved by either increasing the dissociation constant of the roadblocking protein  
 774 or by increasing the inter-promoter distance from 47 to 72 bp. **b)** Constructs with different LacI  
 775  $K_D$  values and inter-promoter distances (either 47 or 72 bp) exhibit varying logic behaviors.  
 776 Modifications of the original TIM lead to higher GFP expression in the aTc only condition,  
 777 improving OR behavior. \* indicates significant differences in the aTc+IPTG condition with  
 778 respect to the other inducer combinations shown. (Mann-Whitney  $U$  test,  $p$ -value<0.05). **c)** The  
 779 triangle plot shows three metrics of gate behavior: dynamic range,  $r$ ; the asymmetry,  $a$ , i.e. the

780 responsiveness of the device to each input; and the logic type,  $l$ . OR gate is defined by,  $l=0$  since  
781 three inputs should be able to turn gene expression ON, while all should turn it on to the same  
782 levels, i.e.,  $a=0$ . Constructs lied close to a line parallel to the OR-IPTG gate axis, which indicates  
783 some AND gate component. OR behavior is improved with the increase of LacI  $K_D$ , since allowing  
784 the upstream, aTc-induced pTet to readthrough the roadblock increases the contributions of the  
785 aTc input. Empty circles: 47 bp separation; patterned circles: 72 bp separation. Note: pAE\_LG27  
786 is not represented in this plot because it belongs to a separate logic gate parameter space (OR-  
787 AND-aTc). **d**) Fractional readthrough increases with LacI  $K_D$  independently of the pTet-pLac  
788 distance (brown: 47 bp, grey: 72 bp).

789

790

791

792

793

794

795

796

797

798

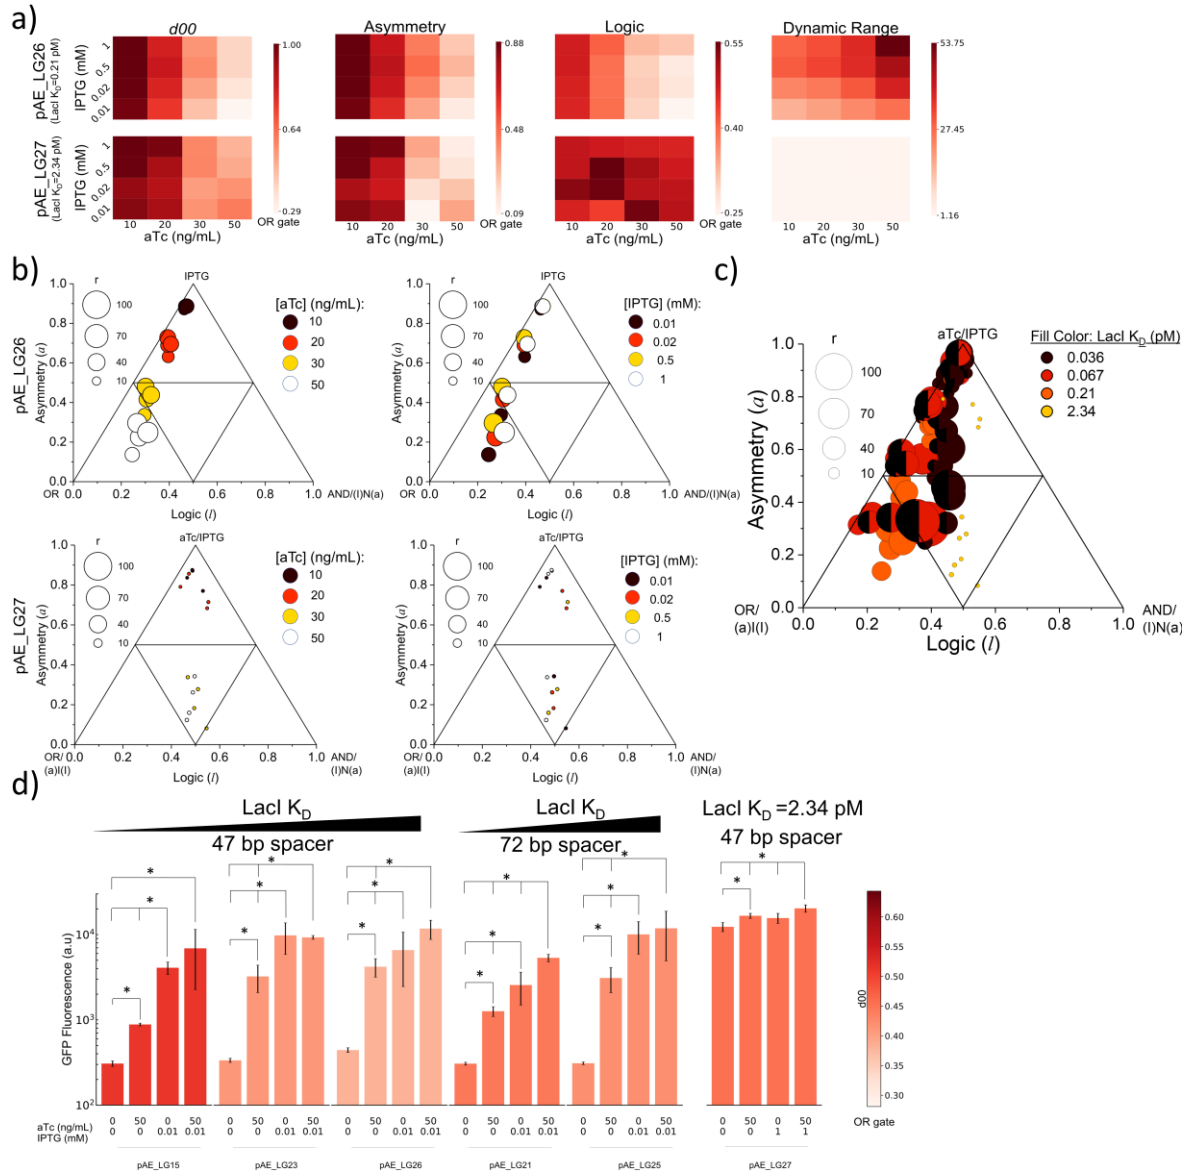

799 **Figure 6:** Optimization of OR gate behavior. **a)** Heat maps of logic gate analysis parameters for  
 800 varying aTc and IPTG inducer concentrations for two OR constructs—pAE\_LG26, which  
 801 exhibited best OR behavior at saturating inducer concentrations and pAE\_LG27, which has a high  
 802  $\text{Lacl } K_D$ . **b)** Triangle plots for pAE\_LG26 (top) and pAE\_LG27 (bottom) showing trends in gate  
 803 behavior with changing IPTG (left) and aTc (right). For pAE\_LG26, data points resulting from  
 804 combinations of four inducer levels belonged to the OR-AND-IPTG space ( $\text{GFP}_{a+I} > \text{GFP}_{\text{IPTG}} >$   
 805  $\text{GFP}_{a\text{Tc}} > \text{GFP}_{\text{Basal}}$ ) or the OR-(I)N(a)-IPTG space ( $\text{GFP}_{\text{IPTG}} > \text{GFP}_{a+I} > \text{GFP}_{a\text{Tc}} > \text{GFP}_{\text{Basal}}$ ). For  
 806 pAE\_LG27 data belonged to one of the following spaces: (a)I(I)-(I)N(a)-IPTG, OR-(I)N(a)-IPTG,  
 807 OR-AND-IPTG, OR-AND-aTc or a(I)I-(I)N(a)-IPTG. Due to the high expression conditions of  
 808 control construct pAE\_LG27 at any inducer combination, its regulatory range,  $r$ , is very small and

809 strictly its GFP expression profile is not always  $GFP_{a+I} > GFP_{aTc} > GFP_{IPTG} > GFP_{Basal}$ , thus resulting  
810 in this myriad of logic spaces. **c)** Triangle plot for all 6 OR constructs at different aTc and IPTG  
811 combinations. Half circles denote a 72 bp spacer. The observed logic parameter spaces excepting  
812 control construct pAE\_LG27 were OR-AND-IPTG and OR-(I)N(a)-IPTG. **d)** OR behaviors for  
813 each construct at conditions that minimize  $d_{00}$ . \* indicates significant differences in the aTc+IPTG  
814 condition with respect to the other inducer combinations shown. (Mann-Whitney  $U$  test,  
815  $p$ -value<0.05)

816

817

818

819

820

821

822

823

824

825

826

827

828

829

830

831

832

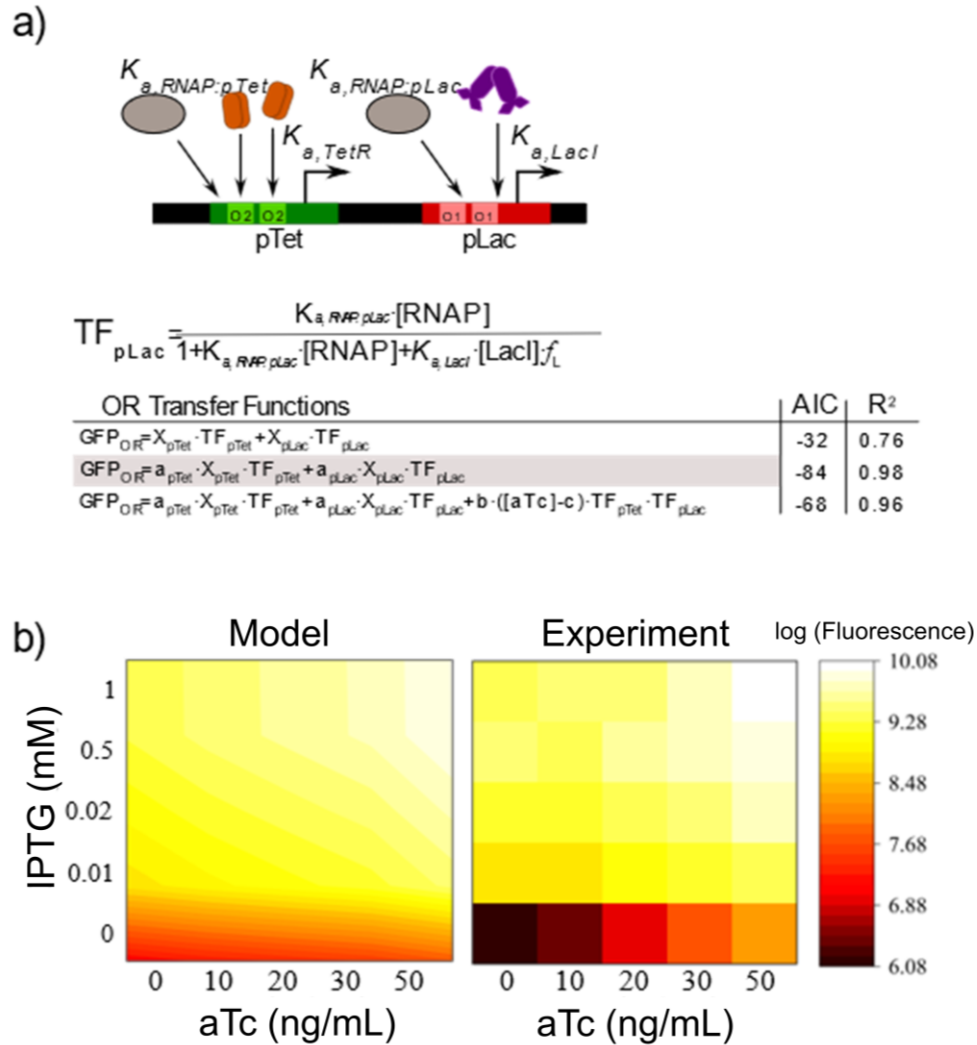

833 **Figure 7:** Mathematical models capture OR behavior. a) Schematic showing the competing  
 834 binding interactions at the pTet and pLac promoters, with specific association constants for each  
 835 binding protein. Transfer functions describing the occupancy of the promoters are derived using  
 836 the Shea-Ackers formalism—partitioning binding events that allow transcription in the numerator  
 837 and all possible states in the denominator. Note that all of the transfer functions and derivations  
 838 are identical to that presented in the AND modeling in Figure 3, only the LacO transfer function,  
 839  $TF_{LacO}$  has been replaced with the pLac transfer function,  $TF_{pLac}$ . These parameters are assembled  
 840 into model equations describing the observed gate behaviors and quantified using the Akaike  
 841 Information Criterion (AIC), a model selection criterion that penalizes spurious parameters in the  
 842 model equations, with low AIC values indicating a better fit. For pAE\_LG26, a model equation  
 843 describing the additive contributions from tandem promoters with terms  $a_{pTet}$  and  $a_{pLac}$  to describe  
 844 the promoters' relative contributions to GFP expression provided the best fit, with an  $R^2$  of 0.95.

845 **b)** Log-transformed GFP expression data for pAE\_LG26 from 5 different concentrations of aTc  
846 and IPTG was used to fit the model equation with the lowest AIC value.

847

848
